# Supplementary material for: Prognostic Analysis of PTEN Mutation in Endometrial Carcinoma
Source: Research Square preprint supplement (doi:10.21203/rs.3.rs-1252352/v1), 2022-01-24
Supplement: Supplementary file 2 [file a87f2be44f749f5ca2422f11.xlsx]

## Sheet: Table S1 PTEN_mutationVSwild_di
	logFC	AveExpr	t	P.Value	adj.P.Val	B
L1CAM	-1.57832	0.924584	-18.2312	6.89132e-58	4.02363e-53	120.735
KIAA1324	2.32234	2.98035	17.858	4.45085e-56	1.29936e-51	116.578
SPDEF	2.08464	3.45182	16.9214	1.41102e-51	2.05963e-47	106.243
PNMA3	-1.09139	0.738503	-16.6945	1.69742e-50	1.98215e-46	103.763
CLDN6	-2.11016	1.32448	-15.723	6.35974e-46	3.71326e-42	93.2658
TFF3	2.74464	4.23277	15.267	8.26218e-44	4.02003e-40	88.4162
CDKN2A	-1.37441	2.0121	-15.0454	8.62593e-43	3.87417e-39	86.0792
C9orf152	1.05282	1.52354	14.5731	1.22277e-40	3.75758e-37	81.1443
FOXA2	1.42288	2.26328	14.5651	1.329e-40	3.87982e-37	81.0614
BCAM	-1.17287	4.25127	-14.5031	2.5346e-40	6.72672e-37	80.4184
CDKN1A	1.01971	3.67855	14.3754	9.54676e-40	2.40561e-36	79.0976
PPAP2C	1.03401	3.05504	14.3149	1.7854e-39	4.00938e-36	78.4742
IGF2BP2	-1.3183	1.61887	-13.9015	1.25059e-37	2.02828e-34	74.2434
SPATA18	1.04714	1.52074	13.7925	3.79776e-37	5.68564e-34	73.1375
PNOC	-1.06821	0.649801	-13.3516	3.26224e-35	3.34162e-32	68.7052
CLDN9	-1.07395	1.13767	-13.1837	1.74442e-34	1.6697e-31	67.0368
GLYATL2	1.52494	1.72741	12.8792	3.55872e-33	2.96833e-30	64.0365
HGD	1.17733	2.49971	12.7172	1.74396e-32	1.32239e-29	62.4556
UCHL1	-1.6985	2.22984	-12.6415	3.65181e-32	2.5689e-29	61.7205
WNT7A	-1.44996	1.64456	-12.5206	1.18406e-31	7.12718e-29	60.5507
BEX2	-1.07634	2.27517	-12.3324	7.29594e-31	4.09604e-28	58.7425
KLK7	-1.16489	0.928739	-12.2248	2.04862e-30	1.07759e-27	57.716
KLK8	-1.02231	0.880862	-12.0854	7.75084e-30	3.67926e-27	56.3932
CAPS	1.39189	4.32242	11.9387	3.11685e-29	1.34803e-26	55.01
IHH	1.71751	2.00255	11.915	3.90175e-29	1.66286e-26	54.7868
MLPH	1.12473	2.46814	11.8975	4.59939e-29	1.91818e-26	54.6233
SLC47A1	1.2903	1.92947	11.8739	5.74523e-29	2.3623e-26	54.4023
PGR	1.16957	1.83778	11.8053	1.09567e-28	4.26485e-26	53.7607
TNNT1	-1.43839	1.60919	-11.7717	1.50244e-28	5.77125e-26	53.447
KLK6	-1.30196	1.31821	-11.7453	1.92373e-28	7.2465e-26	53.2014
SLC25A35	1.05197	2.02795	11.5413	1.28767e-27	4.37112e-25	51.3125
SCGB2A1	1.95521	5.43324	11.5116	1.69518e-27	5.65581e-25	51.0393
PIGR	2.14562	4.01158	11.4978	1.92698e-27	6.28551e-25	50.912
ITM2C	-1.10326	4.41252	-11.3101	1.08506e-26	3.19968e-24	49.1954
RP11-6E9.4	1.59408	1.84173	11.2936	1.26213e-26	3.70313e-24	49.0453
PCSK1N	-1.21931	2.11388	-11.2158	2.56966e-26	7.0439e-24	48.3392
ESR1	1.0187	2.79036	11.2115	2.67241e-26	7.2913e-24	48.3003
CREB3L1	1.20272	2.42387	10.9959	1.88435e-25	4.47243e-23	46.361
PLEKHS1	1.05704	1.70022	10.9863	2.05428e-25	4.83641e-23	46.2753
BMP7	-1.04207	1.5608	-10.585	7.31647e-24	1.43337e-21	42.7296
S100A1	-1.17574	1.7176	-10.5713	8.25408e-24	1.5958e-21	42.61
SST	-1.62858	1.53831	-10.5599	9.1205e-24	1.74026e-21	42.511
ASS1	-1.04082	3.41766	-10.1221	4.05756e-22	5.90795e-20	38.7472
BMPR1B-AS1	1.28266	2.46841	10.1115	4.4436e-22	6.422e-20	38.6571
SPON1	-1.30027	2.46322	-9.76831	8.0651e-21	9.45576e-19	35.7845
AGR2	1.23638	3.07561	9.67695	1.72537e-20	1.89359e-18	35.0312
C1orf194	1.20938	1.77023	9.66711	1.87201e-20	2.04684e-18	34.9504
MSX1	1.48512	4.47834	9.53619	5.51514e-20	5.63945e-18	33.8803
CXCL14	1.45418	3.27185	9.33785	2.78028e-19	2.5849e-17	32.2789
EYA2	1.05175	3.68234	9.10231	1.84085e-18	1.48428e-16	30.4085
CRABP2	-1.01667	3.99823	-8.7972	2.02443e-17	1.34932e-15	28.0376
RP11-519G16.5	1.05397	2.2189	8.77988	2.31564e-17	1.52945e-15	27.9048
MAL	-1.24472	2.31689	-8.71143	3.93063e-17	2.47037e-15	27.3819
TPPP3	1.1542	2.7899	8.54186	1.43902e-16	8.25346e-15	26.0998
CAPN6	1.09844	2.13749	8.46636	2.54938e-16	1.42714e-14	25.535
SCGB1D2	1.3806	3.45225	8.15025	2.68256e-15	1.25603e-13	23.2121
MUC5B	1.11935	1.55501	8.03625	6.1663e-15	2.73715e-13	22.3911
C19orf33	-1.00741	3.14335	-8.02038	6.91913e-15	3.0375e-13	22.2776
C20orf85	1.35053	2.16351	7.81571	3.00886e-14	1.17905e-12	20.8288
C9orf24	1.0158	1.60604	7.7235	5.77984e-14	2.15084e-12	20.1857
UPK1B	1.05063	2.08175	7.3243	9.10522e-13	2.76889e-11	17.4724
OVGP1	1.0493	1.72619	7.15573	2.81835e-12	7.8999e-11	16.3619
SCGB3A1	1.07633	1.97708	6.85981	1.94801e-11	4.68241e-10	14.464
CXCL17	1.04604	2.79653	6.80983	2.68306e-11	6.31806e-10	14.15
IGF2	-1.01158	2.86029	-6.67082	6.47145e-11	1.41463e-09	13.2869
LTF	1.08734	2.59918	5.52861	5.09535e-08	6.56158e-07	6.77867

## Sheet: Table S2 GO_Bioprocess
MF	GO:0004861	cyclin-dependent protein serine/threonine kinase inhibitor activity	2/56	12/17696	0.00063611	0.0363755	0.02735	CDKN2A/CDKN1A	2
MF	GO:0048018	receptor ligand activity	7/56	482/17696	0.000778903	0.0363755	0.02735	PNOC/WNT7A/BMP7/SST/CXCL14/SCGB3A1/IGF2	7
MF	GO:0030546	signaling receptor activator activity	7/56	487/17696	0.0008275	0.0363755	0.02735	PNOC/WNT7A/BMP7/SST/CXCL14/SCGB3A1/IGF2	7
MF	GO:0004252	serine-type endopeptidase activity	4/56	160/17696	0.00164027	0.0363755	0.02735	KLK7/KLK8/KLK6/LTF	4
MF	GO:0030295	protein kinase activator activity	3/56	80/17696	0.00207562	0.0363755	0.02735	CDKN1A/IGF2/LTF	3
MF	GO:0051117	ATPase binding	3/56	80/17696	0.00207562	0.0363755	0.02735	PGR/ESR1/S100A1	3
MF	GO:0004175	endopeptidase activity	6/56	427/17696	0.00223293	0.0363755	0.02735	UCHL1/KLK7/KLK8/KLK6/CAPN6/LTF	6
MF	GO:0019887	protein kinase regulator activity	4/56	180/17696	0.00251829	0.0363755	0.02735	CDKN2A/CDKN1A/IGF2/LTF	4
MF	GO:0019209	kinase activator activity	3/56	86/17696	0.00255107	0.0363755	0.02735	CDKN1A/IGF2/LTF	3
MF	GO:0008236	serine-type peptidase activity	4/56	182/17696	0.00262083	0.0363755	0.02735	KLK7/KLK8/KLK6/LTF	4
MF	GO:0016825	hydrolase activity	acting on acid phosphorus-nitrogen bonds	4/56	186/17696	0.00283446	0.0363755	0.02735	KLK7/KLK8/KLK6/LTF	4
MF	GO:0017171	serine hydrolase activity	4/56	186/17696	0.00283446	0.0363755	0.02735	KLK7/KLK8/KLK6/LTF	4
MF	GO:0019207	kinase regulator activity	4/56	207/17696	0.00415439	0.0492135	0.0370027	CDKN2A/CDKN1A/IGF2/LTF	4

## Sheet: Table S3 GO_Molecular function
MF	GO:0004861	cyclin-dependent protein serine/threonine kinase inhibitor activity	2/56	12/17696	0.00063611	0.0363755	0.02735	CDKN2A/CDKN1A	2
MF	GO:0048018	receptor ligand activity	7/56	482/17696	0.000778903	0.0363755	0.02735	PNOC/WNT7A/BMP7/SST/CXCL14/SCGB3A1/IGF2	7
MF	GO:0030546	signaling receptor activator activity	7/56	487/17696	0.0008275	0.0363755	0.02735	PNOC/WNT7A/BMP7/SST/CXCL14/SCGB3A1/IGF2	7
MF	GO:0004252	serine-type endopeptidase activity	4/56	160/17696	0.00164027	0.0363755	0.02735	KLK7/KLK8/KLK6/LTF	4
MF	GO:0030295	protein kinase activator activity	3/56	80/17696	0.00207562	0.0363755	0.02735	CDKN1A/IGF2/LTF	3
MF	GO:0051117	ATPase binding	3/56	80/17696	0.00207562	0.0363755	0.02735	PGR/ESR1/S100A1	3
MF	GO:0004175	endopeptidase activity	6/56	427/17696	0.00223293	0.0363755	0.02735	UCHL1/KLK7/KLK8/KLK6/CAPN6/LTF	6
MF	GO:0019887	protein kinase regulator activity	4/56	180/17696	0.00251829	0.0363755	0.02735	CDKN2A/CDKN1A/IGF2/LTF	4
MF	GO:0019209	kinase activator activity	3/56	86/17696	0.00255107	0.0363755	0.02735	CDKN1A/IGF2/LTF	3
MF	GO:0008236	serine-type peptidase activity	4/56	182/17696	0.00262083	0.0363755	0.02735	KLK7/KLK8/KLK6/LTF	4
MF	GO:0016825	hydrolase activity	acting on acid phosphorus-nitrogen bonds	4/56	186/17696	0.00283446	0.0363755	0.02735	KLK7/KLK8/KLK6/LTF	4
MF	GO:0017171	serine hydrolase activity	4/56	186/17696	0.00283446	0.0363755	0.02735	KLK7/KLK8/KLK6/LTF	4
MF	GO:0019207	kinase regulator activity	4/56	207/17696	0.00415439	0.0492135	0.0370027	CDKN2A/CDKN1A/IGF2/LTF	4

## Sheet: Table S4 KEGG Pathways
ID	Description	GeneRatio	BgRatio	pvalue	p.adjust	qvalue	geneID	Count
hsa05205	Proteoglycans in cancer	44338	205/8081	0.000185282	0.0187135	0.0144325	CDKN1A/WNT7A/IHH/ESR1/IGF2	5
hsa05224	Breast cancer	44308	147/8081	0.000595728	0.0244913	0.0188886	CDKN1A/WNT7A/PGR/ESR1	4
hsa04934	Cushing syndrome	44308	155/8081	0.000727465	0.0244913	0.0188886	CDKN2A/CDKN1A/WNT7A/CREB3L1	4
hsa05225	Hepatocellular carcinoma	44308	168/8081	0.000983849	0.0248422	0.0191592	CDKN2A/CDKN1A/WNT7A/IGF2	4
hsa01522	Endocrine resistance	44277	98/8081	0.00225312	0.0440141	0.0339452	CDKN2A/CDKN1A/ESR1	3
hsa05166	Human T-cell leukemia virus 1 infection	44308	219/8081	0.0026147	0.0440141	0.0339452	CDKN2A/CDKN1A/CREB3L1/MSX1	4

## Sheet: Table S5 Canonical_Pathways
© 2000-2020 QIAGEN. All rights reserved.
Ingenuity Canonical Pathways	-log(p-value)	Ratio	z-score	Molecules
Neuroprotective Role of THOP1 in Alzheimer's Disease	4.73	0.0431	#NUM!	KLK6,KLK7,KLK8,PNOC,SST
Intrinsic Prothrombin Activation Pathway	3.65	0.0714	#NUM!	KLK6,KLK7,KLK8
MSP-RON Signaling Pathway	3.24	0.0517	#NUM!	KLK6,KLK7,KLK8
SPINK1 Pancreatic Cancer Pathway	3.19	0.05	#NUM!	KLK6,KLK7,KLK8
Glioblastoma Multiforme Signaling	2.92	0.0242	-1	CDKN1A,CDKN2A,IGF2,WNT7A
Granulocyte Adhesion and Diapedesis	2.85	0.0231	#NUM!	CLDN6,CLDN9,CXCL14,CXCL17
Agranulocyte Adhesion and Diapedesis	2.67	0.0207	#NUM!	CLDN6,CLDN9,CXCL14,CXCL17
Estrogen-mediated S-phase Entry	2.62	0.0769	#NUM!	CDKN1A,ESR1
Glioma Signaling	2.44	0.0273	#NUM!	CDKN1A,CDKN2A,IGF2
MSP-RON Signaling In Macrophages Pathway	2.4	0.0265	#NUM!	KLK6,KLK7,KLK8
Molecular Mechanisms of Cancer	2.28	0.0125	#NUM!	BMP7,CDKN1A,CDKN2A,IHH,WNT7A
MSP-RON Signaling In Cancer Cells Pathway	2.2	0.0224	#NUM!	KLK6,KLK7,KLK8
Aryl Hydrocarbon Receptor Signaling	2.12	0.021	#NUM!	CDKN1A,CDKN2A,ESR1
Cell Cycle: G2/M DNA Damage Checkpoint Regulation	2.08	0.0408	#NUM!	CDKN1A,CDKN2A
Melanoma Signaling	2.06	0.04	#NUM!	CDKN1A,CDKN2A
HOTAIR Regulatory Pathway	1.99	0.0187	#NUM!	CDKN1A,ESR1,WNT7A
Estrogen Receptor Signaling	1.87	0.0122	0	CDKN1A,ESR1,IGF2,PGR
Citrulline-Nitric Oxide Cycle	1.86	0.2	#NUM!	ASS1
Tyrosine Degradation I	1.86	0.2	#NUM!	HGD
Cell Cycle: G1/S Checkpoint Regulation	1.82	0.0299	#NUM!	CDKN1A,CDKN2A
Arginine Biosynthesis IV	1.78	0.167	#NUM!	ASS1
Urea Cycle	1.78	0.167	#NUM!	ASS1
Basal Cell Carcinoma Signaling	1.76	0.0278	#NUM!	BMP7,WNT7A
Antiproliferative Role of Somatostatin Receptor 2	1.7	0.026	#NUM!	CDKN1A,SST
VDR/RXR Activation	1.69	0.0256	#NUM!	CDKN1A,KLK6
BEX2 Signaling Pathway	1.68	0.0253	#NUM!	BEX2,CDKN1A
Cyclins and Cell Cycle Regulation	1.66	0.0247	#NUM!	CDKN1A,CDKN2A
Bladder Cancer Signaling	1.52	0.0206	#NUM!	CDKN1A,CDKN2A
p53 Signaling	1.51	0.0204	#NUM!	CDKN1A,CDKN2A
Chronic Myeloid Leukemia Signaling	1.47	0.0194	#NUM!	CDKN1A,CDKN2A
Pancreatic Adenocarcinoma Signaling	1.42	0.0183	#NUM!	CDKN1A,CDKN2A
Superpathway of Citrulline Metabolism	1.38	0.0667	#NUM!	ASS1
Senescence Pathway	1.38	0.0109	#NUM!	CAPN6,CDKN1A,CDKN2A
Parkinson's Signaling	1.36	0.0625	#NUM!	UCHL1
Role of NANOG in Mammalian Embryonic Stem Cell Pluripotency	1.36	0.0168	#NUM!	BMP7,WNT7A
HGF Signaling	1.35	0.0167	#NUM!	CDKN1A,CDKN2A
GADD45 Signaling	1.28	0.0526	#NUM!	CDKN1A
Cardiomyocyte Differentiation via BMP Receptors	1.26	0.05	#NUM!	BMP7
Human Embryonic Stem Cell Pluripotency	1.26	0.0148	#NUM!	BMP7,WNT7A
Ovarian Cancer Signaling	1.24	0.0144	#NUM!	CDKN2A,WNT7A
Factors Promoting Cardiogenesis in Vertebrates	1.18	0.0133	#NUM!	BMP7,WNT7A
Role of p14/p19ARF in Tumor Suppression	1.11	0.0345	#NUM!	CDKN2A
Tight Junction Signaling	1.09	0.0119	#NUM!	CLDN6,CLDN9
Wnt/β-catenin Signaling	1.07	0.0116	#NUM!	CDKN2A,WNT7A
Leukocyte Extravasation Signaling	0.991	0.0104	#NUM!	CLDN6,CLDN9
HER-2 Signaling in Breast Cancer	0.987	0.0103	#NUM!	CDKN1A,PGR
Sertoli Cell-Sertoli Cell Junction Signaling	0.987	0.0103	#NUM!	CLDN6,CLDN9
HIF1α Signaling	0.947	0.00976	#NUM!	CDKN1A,IGF2
BAG2 Signaling Pathway	0.943	0.0233	#NUM!	CDKN1A
Triacylglycerol Biosynthesis	0.936	0.0227	#NUM!	PLPP2
Role of Oct4 in Mammalian Embryonic Stem Cell Pluripotency	0.917	0.0217	#NUM!	FOXA2
nNOS Signaling in Neurons	0.907	0.0213	#NUM!	CAPN6
Role of Osteoblasts, Osteoclasts and Chondrocytes in Rheumatoid Arthritis	0.903	0.00917	#NUM!	BMP7,WNT7A
Myc Mediated Apoptosis Signaling	0.883	0.02	#NUM!	CDKN2A
Amyloid Processing	0.883	0.02	#NUM!	CAPN6
Glucocorticoid Receptor Signaling	0.854	0.00649	#NUM!	CDKN1A,ESR1,PGR
Transcriptional Regulatory Network in Embryonic Stem Cells	0.851	0.0185	#NUM!	L1CAM
Role of CHK Proteins in Cell Cycle Checkpoint Control	0.83	0.0175	#NUM!	CDKN1A
Maturity Onset Diabetes of Young (MODY) Signaling	0.81	0.0167	#NUM!	FOXA2
Retinoic acid Mediated Apoptosis Signaling	0.81	0.0167	#NUM!	CRABP2
PCP pathway	0.81	0.0167	#NUM!	WNT7A
Axonal Guidance Signaling	0.793	0.00607	#NUM!	BMP7,L1CAM,WNT7A
IL-17A Signaling in Airway Cells	0.777	0.0154	#NUM!	MUC5B
Growth Hormone Signaling	0.742	0.0141	#NUM!	IGF2
Non-Small Cell Lung Cancer Signaling	0.73	0.0137	#NUM!	CDKN2A
GPCR-Mediated Integration of Enteroendocrine Signaling Exemplified by an L Cell	0.73	0.0137	#NUM!	SST
Regulation of Cellular Mechanics by Calpain Protease	0.726	0.0135	#NUM!	CAPN6
Estrogen-Dependent Breast Cancer Signaling	0.721	0.0133	#NUM!	ESR1
Role of Wnt/GSK-3β Signaling in the Pathogenesis of Influenza	0.706	0.0128	#NUM!	WNT7A
Role of BRCA1 in DNA Damage Response	0.695	0.0125	#NUM!	CDKN1A
JAK/Stat Signaling	0.695	0.0125	#NUM!	CDKN1A
Regulation Of The Epithelial Mesenchymal Transition In Development Pathway	0.676	0.0119	#NUM!	WNT7A
BMP signaling pathway	0.672	0.0118	#NUM!	BMP7
Prostate Cancer Signaling	0.646	0.011	#NUM!	CDKN1A
TGF-β Signaling	0.625	0.0104	#NUM!	BMP7
Amyotrophic Lateral Sclerosis Signaling	0.622	0.0103	#NUM!	CAPN6
ATM Signaling	0.622	0.0103	#NUM!	CDKN1A
Apoptosis Signaling	0.611	0.01	#NUM!	CAPN6
FAK Signaling	0.595	0.00962	#NUM!	CAPN6
Telomerase Signaling	0.585	0.00935	#NUM!	CDKN1A
Cholecystokinin/Gastrin-mediated Signaling	0.545	0.0084	#NUM!	SST
FXR/RXR Activation	0.524	0.00794	#NUM!	FOXA2
Ferroptosis Signaling Pathway	0.524	0.00794	#NUM!	CDKN1A
White Adipose Tissue Browning Pathway	0.516	0.00775	#NUM!	BMP7
Protein Kinase A Signaling	0.51	0.005	#NUM!	EYA2,IHH
Adipogenesis pathway	0.503	0.00746	#NUM!	BMP7
STAT3 Pathway	0.5	0.00741	#NUM!	CDKN1A
PTEN Signaling	0.498	0.00735	#NUM!	CDKN1A
Iron homeostasis signaling pathway	0.495	0.0073	#NUM!	BMP7
Hereditary Breast Cancer Signaling	0.487	0.00714	#NUM!	CDKN1A
Endocannabinoid Cancer Inhibition Pathway	0.479	0.00699	#NUM!	CDKN1A
Necroptosis Signaling Pathway	0.446	0.00637	#NUM!	CAPN6
eNOS Signaling	0.442	0.00629	#NUM!	ESR1
Tumor Microenvironment Pathway	0.408	0.00568	#NUM!	IGF2
Acute Phase Response Signaling	0.4	0.00556	#NUM!	CRABP2
PI3K/AKT Signaling	0.393	0.00543	#NUM!	CDKN1A
Hepatic Cholestasis	0.389	0.00538	#NUM!	ESR1
Hepatic Fibrosis / Hepatic Stellate Cell Activation	0.389	0.00538	#NUM!	IGF2
IL-17 Signaling	0.387	0.00535	#NUM!	MUC5B
RhoGDI Signaling	0.384	0.00529	#NUM!	ESR1
Regulation of the Epithelial-Mesenchymal Transition Pathway	0.379	0.00521	#NUM!	WNT7A
RAR Activation	0.376	0.00515	#NUM!	CRABP2
ERK/MAPK Signaling	0.363	0.00495	#NUM!	ESR1
Calcium Signaling	0.356	0.00485	#NUM!	TNNT1
AMPK Signaling	0.345	0.00469	#NUM!	CDKN1A
Integrin Signaling	0.345	0.00469	#NUM!	CAPN6
Osteoarthritis Pathway	0.334	0.00455	#NUM!	IHH
Huntington's Disease Signaling	0.309	0.00418	#NUM!	CAPN6
Opioid Signaling Pathway	0.299	0.00405	#NUM!	PNOC
Colorectal Cancer Metastasis Signaling	0.292	0.00395	#NUM!	WNT7A
Protein Ubiquitination Pathway	0.269	0.00366	#NUM!	UCHL1
Role of Macrophages, Fibroblasts and Endothelial Cells in Rheumatoid Arthritis	0.23	0.00318	#NUM!	WNT7A
Systemic Lupus Erythematosus In T Cell Signaling Pathway	0.214	0.00299	#NUM!	ESR1
Breast Cancer Regulation by Stathmin1	0	0.00169	#NUM!	SPDEF
Cardiac Hypertrophy Signaling (Enhanced)	0	0.00201	#NUM!	WNT7A
Hepatic Fibrosis Signaling Pathway	0	0.00265	#NUM!	WNT7A

## Sheet: Table S6 Diseases_Functions
© 2000-2020 QIAGEN. All rights reserved.
Category	p-value	Molecules
Cancer	5.43E-11-2.21E-03	AGR2,ASS1,BCAM,BEX2,BMP7,C19orf33,C1orf194,C20orf85,C9orf152,C9orf24,CAPN6,CAPS,CDKN1A,CDKN2A,CLDN6,CLDN9,CRABP2,CREB3L1,CXCL14,CXCL17,ELAPOR1,ESR1,EYA2,FOXA2,GLYATL2,HGD,IGF2,IGF2BP2,IHH,ITM2C,KIF1A,KLK6,KLK7,KLK8,L1CAM,LTF,MAL,MLPH,MSX1,MUC5B,OVGP1,PCSK1N,PGR,PIGR,PLEKHS1,PLPP2,PNMA3,PNOC,S100A1,SCGB1D2,SCGB2A1,SCGB3A1,SLC25A35,SLC47A1,SPATA18,SPDEF,SPON1,SST,TFF3,TNNT1,TPPP3,UCHL1,UPK1B,WNT7A
Endocrine System Disorders	5.43E-11-1.87E-03	AGR2,ASS1,BCAM,BEX2,BMP7,C19orf33,C1orf194,C9orf152,C9orf24,CAPN6,CAPS,CDKN1A,CDKN2A,CLDN6,CLDN9,CREB3L1,CXCL14,CXCL17,ELAPOR1,ESR1,EYA2,FOXA2,GLYATL2,HGD,IGF2,IGF2BP2,IHH,ITM2C,KIF1A,KLK6,KLK7,KLK8,L1CAM,LTF,MLPH,MSX1,MUC5B,OVGP1,PCSK1N,PGR,PIGR,PLEKHS1,PLPP2,PNMA3,S100A1,SCGB2A1,SCGB3A1,SLC25A35,SLC47A1,SPATA18,SPDEF,SPON1,SST,TFF3,TNNT1,TPPP3,UCHL1,WNT7A
Organismal Injury and Abnormalities	5.43E-11-2.21E-03	AGR2,ASS1,BCAM,BEX2,BMP7,C19orf33,C1orf194,C20orf85,C9orf152,C9orf24,CAPN6,CAPS,CDKN1A,CDKN2A,CLDN6,CLDN9,CRABP2,CREB3L1,CXCL14,CXCL17,ELAPOR1,ESR1,EYA2,FOXA2,GLYATL2,HGD,IGF2,IGF2BP2,IHH,ITM2C,KIF1A,KLK6,KLK7,KLK8,L1CAM,LTF,MAL,MLPH,MSX1,MUC5B,OVGP1,PCSK1N,PGR,PIGR,PLEKHS1,PLPP2,PNMA3,PNOC,S100A1,SCGB1D2,SCGB2A1,SCGB3A1,SLC25A35,SLC47A1,SPATA18,SPDEF,SPON1,SST,TFF3,TNNT1,TPPP3,UCHL1,UPK1B,WNT7A
Reproductive System Disease	5.43E-11-2.08E-03	AGR2,ASS1,BCAM,BEX2,BMP7,C1orf194,C20orf85,CAPN6,CDKN1A,CDKN2A,CLDN6,CLDN9,CRABP2,CREB3L1,CXCL14,ELAPOR1,ESR1,EYA2,FOXA2,GLYATL2,HGD,IGF2,IGF2BP2,IHH,ITM2C,KIF1A,KLK6,KLK7,KLK8,L1CAM,LTF,MAL,MLPH,MSX1,MUC5B,OVGP1,PGR,PIGR,PLEKHS1,S100A1,SCGB1D2,SCGB2A1,SCGB3A1,SLC47A1,SPATA18,SPDEF,SPON1,TFF3,TNNT1,UCHL1,WNT7A
Cellular Growth and Proliferation	2.46E-09-2.14E-03	AGR2,ASS1,BEX2,BMP7,CAPN6,CDKN1A,CDKN2A,CLDN6,CRABP2,CXCL14,ESR1,FOXA2,IGF2,IHH,KIF1A,KLK6,KLK7,KLK8,L1CAM,LTF,MSX1,PCSK1N,PGR,S100A1,SCGB3A1,SPDEF,SST,TFF3,UCHL1,WNT7A
Tissue Development	2.46E-09-2.14E-03	AGR2,BEX2,BMP7,CAPN6,CDKN1A,CDKN2A,CLDN6,CRABP2,CREB3L1,CXCL14,ESR1,FOXA2,IGF2,IHH,KIF1A,KLK6,KLK7,KLK8,L1CAM,LTF,MLPH,MSX1,PGR,SCGB3A1,SPDEF,SPON1,SST,UCHL1,UPK1B,WNT7A
DNA Replication, Recombination, and Repair	6.06E-09-1.89E-04	BMP7,CDKN1A,CDKN2A,ESR1,IGF2,OVGP1,PGR,SST
Nucleic Acid Metabolism	6.06E-09-6.06E-09	BMP7,CDKN1A,CDKN2A,ESR1,IGF2,PGR,SST
Small Molecule Biochemistry	6.06E-09-1.62E-03	BMP7,CDKN1A,CDKN2A,CRABP2,CXCL14,ESR1,FOXA2,IGF2,IGF2BP2,IHH,LTF,PGR,PLPP2,PNOC,SST
Cell Cycle	2.78E-08-2.05E-03	ASS1,BMP7,CDKN1A,CDKN2A,CXCL14,ESR1,FOXA2,IGF2,LTF,MSX1,PGR,PLPP2,SCGB3A1,SPDEF,SST,TFF3,WNT7A
Cellular Movement	2.79E-08-2.01E-03	AGR2,BCAM,BMP7,CDKN1A,CDKN2A,CREB3L1,CXCL14,CXCL17,ESR1,EYA2,FOXA2,IGF2,KLK6,KLK7,L1CAM,LTF,PGR,PIGR,PNOC,S100A1,SCGB3A1,SPDEF,SST,TFF3,UCHL1,WNT7A
Cell Death and Survival	2.9E-08-2.05E-03	AGR2,ASS1,BEX2,BMP7,CAPN6,CDKN1A,CDKN2A,CRABP2,CREB3L1,CXCL14,CXCL17,ESR1,EYA2,FOXA2,IGF2,IGF2BP2,IHH,KIF1A,KLK6,KLK7,L1CAM,LTF,MSX1,MUC5B,PCSK1N,PGR,PIGR,S100A1,SCGB3A1,SLC47A1,SPDEF,SST,TFF3,TNNT1,UCHL1,WNT7A
Cell Morphology	3.92E-08-2.06E-03	AGR2,BCAM,BMP7,CDKN1A,CDKN2A,CREB3L1,CXCL14,ESR1,EYA2,FOXA2,IGF2,IHH,KIF1A,KLK6,MLPH,PGR,S100A1,SPDEF,SST,TNNT1,UCHL1
Digestive System Development and Function	1.05E-07-1.73E-03	AGR2,BCAM,BMP7,CDKN1A,CDKN2A,CREB3L1,CXCL14,ESR1,FOXA2,IGF2,IHH,MSX1,PIGR,SPDEF,SST,TFF3
Embryonic Development	2.77E-07-2.18E-03	BEX2,BMP7,CAPN6,CDKN1A,CDKN2A,CLDN6,CRABP2,CXCL14,ESR1,FOXA2,IGF2,IHH,KIF1A,KLK7,L1CAM,MSX1,PGR,SCGB3A1,SPDEF,SST,UCHL1,WNT7A
Organismal Development	2.77E-07-2.18E-03	AGR2,BCAM,BEX2,BMP7,CAPN6,CDKN1A,CDKN2A,CLDN6,CRABP2,CREB3L1,CXCL14,CXCL17,ELAPOR1,ESR1,FOXA2,IGF2,IHH,KIF1A,KLK7,KLK8,L1CAM,LTF,MSX1,MUC5B,PCSK1N,PGR,PIGR,S100A1,SCGB3A1,SPDEF,SPON1,SST,TFF3,UCHL1,WNT7A
Skeletal and Muscular System Development and Function	2.77E-07-1.98E-03	BMP7,CAPN6,CDKN1A,CDKN2A,CRABP2,CREB3L1,CXCL14,ESR1,IGF2,IHH,L1CAM,LTF,MSX1,PGR,SCGB3A1,SPON1,UCHL1,WNT7A
Cellular Development	3.15E-07-2.14E-03	ASS1,BEX2,BMP7,CAPN6,CDKN1A,CDKN2A,CLDN6,CRABP2,CREB3L1,CXCL14,ESR1,EYA2,FOXA2,IGF2,IHH,KIF1A,KLK6,KLK7,KLK8,L1CAM,LTF,MLPH,MSX1,PGR,S100A1,SCGB3A1,SPDEF,SST,TFF3,UCHL1,UPK1B,WNT7A
Connective Tissue Development and Function	6.93E-07-2.05E-03	BMP7,CDKN1A,CDKN2A,CREB3L1,ESR1,FOXA2,IGF2,IHH,KLK6,KLK8,L1CAM,LTF,MSX1,PGR,PLPP2,SPON1,WNT7A
Organ Morphology	6.93E-07-1.86E-03	AGR2,BCAM,BMP7,CDKN1A,CDKN2A,CREB3L1,CXCL14,CXCL17,ESR1,FOXA2,IGF2,IHH,L1CAM,MSX1,MUC5B,PGR,PIGR,S100A1,SPDEF,SPON1,SST,TFF3,WNT7A
Gastrointestinal Disease	1.18E-06-1.87E-03	AGR2,ASS1,BCAM,BMP7,C20orf85,C9orf152,C9orf24,CAPN6,CDKN1A,CDKN2A,CRABP2,CREB3L1,ELAPOR1,ESR1,EYA2,FOXA2,IGF2,IHH,ITM2C,KIF1A,KLK6,KLK7,L1CAM,LTF,MAL,MLPH,MSX1,MUC5B,OVGP1,PGR,PIGR,PLEKHS1,PLPP2,PNOC,SLC47A1,SPATA18,SPDEF,SPON1,SST,TFF3,TNNT1,TPPP3
Skeletal and Muscular Disorders	2.05E-06-1.89E-03	ASS1,BMP7,CAPN6,CDKN1A,CDKN2A,CRABP2,CREB3L1,CXCL14,ESR1,IGF2,IHH,KIF1A,L1CAM,MLPH,MSX1,MUC5B,OVGP1,PGR,S100A1,SPON1,SST,TNNT1,UCHL1,WNT7A
Hair and Skin Development and Function	2.2E-06-1.95E-03	BMP7,CDKN1A,CDKN2A,CLDN6,CRABP2,ESR1,IGF2,KLK6,KLK7,KLK8,L1CAM,LTF,MSX1,PGR
Organ Development	2.2E-06-2.14E-03	BMP7,CAPN6,CDKN1A,CDKN2A,CLDN6,CRABP2,CXCL14,ESR1,FOXA2,IGF2,IHH,KIF1A,KLK6,KLK7,KLK8,L1CAM,LTF,MSX1,PGR,S100A1,SCGB3A1,SPDEF,SST,UCHL1,WNT7A
Connective Tissue Disorders	2.87E-06-1.42E-03	BMP7,CREB3L1,ESR1,IGF2,IHH,L1CAM,MSX1,PGR,SPON1,WNT7A
Cell-To-Cell Signaling and Interaction	4.81E-06-2.08E-03	ASS1,BCAM,BMP7,CDKN1A,CDKN2A,CLDN6,CLDN9,CREB3L1,CXCL14,ESR1,IGF2,KIF1A,KLK6,KLK8,L1CAM,LTF,PGR,PIGR,PNOC,SCGB3A1,SPDEF,SST,TFF3,UCHL1,WNT7A
Reproductive System Development and Function	5.27E-06-2.05E-03	BMP7,CDKN1A,CDKN2A,CXCL14,ESR1,FOXA2,IGF2,IHH,MSX1,PGR,TPPP3,WNT7A
Behavior	7.75E-06-1.15E-04	ESR1,PGR
Tumor Morphology	1.7E-05-8.12E-04	AGR2,BEX2,BMP7,CDKN1A,CDKN2A,CXCL14,ESR1,IGF2,IHH,PGR,SPDEF,SST,TFF3,UCHL1
Tissue Morphology	1.85E-05-2.04E-03	AGR2,BMP7,CDKN1A,CDKN2A,CREB3L1,CXCL14,CXCL17,ESR1,EYA2,FOXA2,IGF2,IHH,L1CAM,MSX1,PGR,PIGR,S100A1,SPDEF,SST,TFF3,WNT7A
Protein Synthesis	1.98E-05-1.98E-05	ESR1,PGR,SST
Dental Disease	2.32E-05-1.41E-04	BMP7,FOXA2,MSX1
Dermatological Diseases and Conditions	2.32E-05-1.89E-03	AGR2,ASS1,BCAM,BMP7,C19orf33,C1orf194,C9orf152,C9orf24,CAPN6,CDKN1A,CDKN2A,CLDN6,CLDN9,CRABP2,CREB3L1,CXCL17,ELAPOR1,ESR1,EYA2,FOXA2,GLYATL2,HGD,IGF2BP2,IHH,ITM2C,KIF1A,KLK6,KLK7,KLK8,L1CAM,LTF,MLPH,MUC5B,OVGP1,PGR,PIGR,PLEKHS1,PLPP2,PNMA3,SCGB1D2,SCGB2A1,SCGB3A1,SLC47A1,SPATA18,SPDEF,SPON1,SST,TFF3,TNNT1,UCHL1,UPK1B,WNT7A
Developmental Disorder	2.32E-05-1.89E-03	BMP7,CDKN1A,CDKN2A,CRABP2,CREB3L1,ESR1,IGF2,IHH,L1CAM,MSX1,MUC5B,PGR,WNT7A
Neurological Disease	2.32E-05-1.97E-03	ESR1,IHH,KIF1A,L1CAM,PGR,PNOC,TNNT1,UCHL1
Psychological Disorders	2.32E-05-3.44E-04	ESR1,PGR
Renal and Urological Disease	2.32E-05-7.94E-04	BMP7,ESR1,PGR
Gene Expression	3.4E-05-1.2E-03	AGR2,ASS1,BMP7,CDKN1A,CDKN2A,CRABP2,CREB3L1,ESR1,FOXA2,IGF2,IGF2BP2,IHH,KLK6,L1CAM,LTF,MSX1,PGR,PNOC,S100A1,SPDEF,SST,TFF3,WNT7A
Cellular Assembly and Organization	3.48E-05-1.89E-03	ASS1,BCAM,CDKN1A,CLDN6,CLDN9,ESR1,IGF2,KIF1A,KLK6,KLK8,L1CAM,MAL,MLPH,SCGB3A1,UCHL1,WNT7A
Cellular Function and Maintenance	3.48E-05-9.06E-04	CDKN1A,CDKN2A,CLDN6,CLDN9,ESR1,KLK8,L1CAM,SPON1,WNT7A
Endocrine System Development and Function	4.63E-05-1.71E-03	BMP7,CDKN1A,CDKN2A,CXCL14,ESR1,FOXA2,IGF2,IHH,PGR,SST,TFF3,UCHL1
Hematological System Development and Function	4.63E-05-2.14E-03	AGR2,CDKN1A,CDKN2A,CXCL14,CXCL17,ESR1,FOXA2,IGF2,IHH,LTF,PIGR,PNOC,SPDEF,SST
Inflammatory Disease	4.63E-05-1.4E-03	C9orf152,CDKN1A,CDKN2A,CXCL14,ESR1,L1CAM,LTF,MLPH,PGR,PIGR,S100A1,SPON1,UCHL1
Inflammatory Response	4.63E-05-1.94E-03	AGR2,CDKN1A,CDKN2A,CXCL14,CXCL17,ESR1,FOXA2,IGF2,IHH,KLK6,KLK7,KLK8,LTF,PGR,PIGR,PNOC,SPDEF,SST,TFF3,UCHL1
Lipid Metabolism	4.63E-05-1.62E-03	BMP7,CDKN1A,CRABP2,CXCL14,ESR1,FOXA2,IGF2,IGF2BP2,IHH,PGR,PLPP2,PNOC,SST
Molecular Transport	4.63E-05-8.3E-04	BMP7,CDKN1A,CXCL14,ESR1,FOXA2,IGF2,IGF2BP2,IHH,LTF,PGR,PLPP2,PNOC,SST
Carbohydrate Metabolism	5.54E-05-5.6E-04	BMP7,CXCL14,ESR1,FOXA2,IGF2,IGF2BP2,IHH,L1CAM,LTF,PGR,PLPP2,SST
Nervous System Development and Function	7.7E-05-1.89E-03	BEX2,CDKN1A,ESR1,FOXA2,KIF1A,L1CAM,PGR,PNOC,SST,WNT7A
Cardiovascular System Development and Function	7.87E-05-1.28E-03	BCAM,BEX2,CDKN1A,CDKN2A,CREB3L1,CXCL14,ESR1,IGF2,IHH,L1CAM,PGR,S100A1,SCGB3A1,SST,WNT7A
Renal and Urological System Development and Function	1.39E-04-2.08E-03	BCAM,BMP7,CDKN1A,CXCL14,ESR1,IGF2,KLK6,PIGR,SST
Auditory Disease	1.79E-04-1.79E-04	BMP7,MSX1,MUC5B
Auditory and Vestibular System Development and Function	1.79E-04-1.86E-03	BMP7,CXCL17,MSX1,MUC5B
Hepatic System Development and Function	2.14E-04-2.14E-04	BMP7,CDKN1A,CDKN2A,CXCL14,IGF2
Infectious Diseases	2.15E-04-2.15E-04	ESR1,PGR
Nutritional Disease	2.6E-04-2.6E-04	BCAM,ESR1,IGF2,PGR
Hereditary Disorder	3.12E-04-1.97E-03	KIF1A,L1CAM,TNNT1,UCHL1
Respiratory Disease	3.44E-04-1.68E-03	ESR1,IHH,LTF,PGR
Hypersensitivity Response	7.07E-04-7.07E-04	AGR2,CDKN1A,IHH
Metabolic Disease	9.06E-04-9.06E-04	ESR1,PGR
Ophthalmic Disease	9.06E-04-1.42E-03	ESR1,KIF1A,PGR,UCHL1
Immune Cell Trafficking	1.02E-03-1.94E-03	CXCL14,CXCL17,FOXA2,LTF,PIGR,PNOC,SPDEF
Cellular Compromise	1.28E-03-1.28E-03	MAL,UCHL1
Cardiovascular Disease	1.57E-03-1.73E-03	CDKN1A,CDKN2A
Hepatic System Disease	1.57E-03-1.57E-03	CDKN1A,CDKN2A
Vitamin and Mineral Metabolism	1.62E-03-1.62E-03	BMP7,CRABP2,ESR1,FOXA2,IGF2,PGR
Organismal Survival	1.89E-03-1.89E-03	BMP7,CDKN1A,CDKN2A,CRABP2,CXCL17,ESR1,IGF2,LTF,PGR,S100A1
Respiratory System Development and Function	1.89E-03-1.89E-03	MSX1,MUC5B
Hematological Disease	1.93E-03-2.21E-03	CDKN2A,CXCL14,ITM2C,L1CAM,MAL
Immunological Disease	1.93E-03-2.21E-03	CDKN2A,CXCL14,ITM2C,L1CAM,MAL
Lymphoid Tissue Structure and Development	2.04E-03-2.14E-03	CDKN1A,CDKN2A,CXCL14,CXCL17,ESR1,IGF2,PIGR,SST

## Sheet: Table S7 trian_uniCox
gene	HR	HR.95L	HR.95H	coxPvalue
KIAA1324	0.990591	0.985018	0.996195	0.00102159
SPDEF	0.995674	0.99192	0.999442	0.0244865
C9orf152	0.942327	0.891641	0.995894	0.0352198
PPAP2C	0.981626	0.968161	0.995279	0.00850054
CLDN9	1.00748	1.00067	1.01433	0.0311921
UCHL1	1.00502	1.00188	1.00817	0.001698
BEX2	1.02472	1.0086	1.0411	0.00254526
IHH	0.989665	0.981796	0.997598	0.0107618
MLPH	0.975252	0.958117	0.992694	0.00559196
SLC47A1	0.967847	0.947728	0.988393	0.00229442
PGR	0.951584	0.922286	0.981813	0.00186893
SLC25A35	0.965873	0.941323	0.991064	0.00821035
SCGB2A1	0.999412	0.999033	0.999791	0.00236468
ESR1	0.977579	0.962258	0.993145	0.00490106
ASS1	1.00274	1.00019	1.0053	0.0353776
MSX1	0.997913	0.996641	0.999186	0.00132268
CRABP2	1.00104	1.00028	1.00179	0.00726777
MAL	1.00222	1.0002	1.00425	0.0312969

## Sheet: Table S8 TCGA_train_Lasso_coef
Gene	Coef
CLDN9	0.00100641
UCHL1	0.00104315
BEX2	0.00849391
SLC47A1	-0.00672408
PGR	-0.00917598
SLC25A35	-0.00110838
SCGB2A1	-9.74e-05
MSX1	-0.000734694
CRABP2	0.000291436
MAL	0.000234079

## Sheet: Table S9 Networks
© 2000-2020 QIAGEN. All rights reserved.
ID	Molecules in Network	Score	Focus Molecules	Top Diseases and Functions
1	Actin,BMP,BMP7,calpain,CAPN6,collagen,Cyclin A,Cyclin E,E2f,ERK1/2,estrogen receptor,Growth hormone,Hif1,Igf,IGF2,L1CAM,LTF,MLPH,MSX1,MUC5B,Mucin,N-cor,OVGP1,PCSK1N,PGR,PIGR,PLPP2,Rxr,SCGB2A1,Secretase gamma,Smad,SMAD1/5/9,TFF3,thymidine kinase,UPK1B	35	16	[Dental Disease, Developmental Disorder, Gastrointestinal Disease]
2	Akt,Alp,BCAM,BEX2,caspase,Caspase 3/7,CDKN2A,Collagen type I (complex),Collagen(s),CREB3L1,CXCL14,CXCL17,cytochrome C,Hedgehog,Hsp27,IFN Beta,Ifn gamma,IgG,Igm,IHH,IL1,Kallikrein,KLK6,KLK7,KLK8,Laminin (complex),LDL,Mek,PARP,PP2A,SCGB3A1,Serine Protease,SPON1,STAT5a/b,Tgf beta	24	12	[Cancer, Cellular Movement, Endocrine System Disorders]
3	26s Proteasome,Calmodulin,CDKN1A,CG,Ck2,CLDN9,CRABP2,Creb,FOXA2,GNRH,Hdac,HISTONE,Histone H2b,Histone h3,Histone h4,Hsp90,IFN alpha/beta,KIF1A,Lh,MAL,MAP2K1/2,NFkB (complex),Pka,PLC,PNOC,Raf,RNA polymerase II,S100A1,SPDEF,TCF,TFIIH,TNNT1,Ubiquitin,UCHL1,WNT7A	24	12	[Cancer, Organismal Injury and Abnormalities, Reproductive System Disease]
4	ABHD2,ANO2,beta-estradiol,C19orf33,C20orf85,C9orf152,CABP7,CAPS,CDH16,COL13A1,DYNLRB2,ESR2,FAM111A,HGD,LCN2,LILRB5,MPC1,MYH9,NR3C1,PLEKHA6,PLEKHS1,PNMA3,Prl3b1,Prl8a2,progesterone,PRR15L,SCGB1D2,SLC10A3,SLC25A35,SLC2A4RG,SMARCA4,STAT5A,STEAP1,TFF3,TIGD3	19	10	[Dermatological Diseases and Conditions, Inflammatory Disease, Organismal Injury and Abnormalities]
5	ADCY,AGR2,AMPK,Ap1,ASS1,cytokine,DBH-AS1,ELAPOR1,ERK,ESR1,EYA2,FFAR4,Focal adhesion kinase,FSH,G protein,Gsk3,HCG11,Ige,Immunoglobulin,Insulin,Jnk,Mapk,N-arachidonylglycine,P38 MAPK,PI3K (complex),Pkc(s),Prl3d1 (includes others),Proinsulin,Rac,RAS,SRC (family),SST,SSTR5,TPPP3,Vegf	12	7	[Cellular Movement, Digestive System Development and Function, Gastrointestinal Disease]
6	APP,beta-estradiol,C9orf24,CALML4,CLDN20,CLDN6,CLDN8,COL13A1,COL4A6,DYNLRB2,FAM111A,GLYATL2,GPR160,GPR85,IGF2BP2,ITM2C,miR-515-5p (and other miRNAs w/seed UCUCCAA),palmitoyl-coenzyme A,PLEKHA6,PTH1R,PTTG2,RXFP3,SLC13A3,SLC47A1,SPATA18,Sprr2a1/Sprr2a2,Sprr2g,SSTR4,STARD10,TACR3,TCN2,TP53,TSKU,UBL3,ZNF107	12	7	[Cancer, Cell Death and Survival, Organismal Injury and Abnormalities]
